# Supplementary material for: Ancient Jomon genome sequence analysis sheds light on migration patterns of early East Asian populations
Source: Commun Biol. 2020 Aug 25;3:437. doi: 10.1038/s42003-020-01162-2 (PMC7447786; doi:10.1038/s42003-020-01162-2)
Supplement: Supplementary file 2 — Description of Additional Supplementary Files [file 42003_2020_1162_MOESM2_ESM.pdf]

**Supplementary Data 1:** Endogenous human DNA content of ancient individuals in prescreening with Miseq.

**Supplementary Data 2:** Analysis chart of sample ID, position, protocol and laboratory.

**Supplementary Data 3:**  $f_4$  statistics among X, IK002 and Hokkaido Jomons with Mbuti as the outgroup.

**Supplementary Data 4:** Outgroup  $f_3$  statistics among X, IK002 with Mbuti as the outgroup.

**Supplementary Data 5:** Estimation of generation time after admixture of Japanese, Ulchi and Ainu using ALDER with two source of ancestry populations (mainland East Asians (Han, Ami, Korean, Devils cave) and Jomon).

**Supplementary Data 6:**  $D$  statistics among MA-1, X(the eastern Eurasians) and Ami with Mbuti as the outgroup.

**Supplementary Data 7:**  $D$  statistics among X(the eastern Eurasians), MA-1 and Ami with Mbuti as the outgroup.

**Supplementary Data 8:**  $D$  statistics among Ami, X(the eastern Eurasians) and MA-1 with Mbuti as the outgroup.

**Supplementary Data 9:**  $f_4$  statistics among Jomon, Ami and Onge with Mbuti as the outgroup.

**Supplementary Data 10:**  $f_4$  statistics among Onge, X, IK002 with Mbuti as the outgroup.
